# Supplementary material for: An Alternative Serological Measure for Assessing Foot-and-Mouth Disease Vaccine Efficacy against Homologous and Heterologous Viral Challenges in Pigs
Source: MDPI journal article supplement (doi:10.3390/vaccines12010010), 2023-12-21
Supplement: s1 [file s1]

Table S1. Deviance information criterion (DIC) determined in each model for the probability of protection.

| Intercept ( <i>a</i> ) <sup>1</sup> | Slope ( <i>b</i> ) <sup>1</sup> | DIC <sup>2</sup> |              |
|-------------------------------------|---------------------------------|------------------|--------------|
|                                     |                                 | 21-dpv           | 28-dpv       |
| Common                              | Common                          | 196.2            | 183.5        |
| Common                              | Serotype                        | 188.6            | 187.0        |
| Common                              | Strain                          | 189.6            | 185.3        |
| Serotype                            | Common                          | 190.4            | 186.6        |
| Strain                              | Common                          | 190.4            | 182.4        |
| Group <sup>3</sup>                  | Common                          | <b>187.5</b>     | <b>176.5</b> |
| Serotype                            | Serotype                        | 190.8            | 184.2        |
| Strain                              | Serotype                        | 190.7            | 180.3        |
| Serotype                            | Strain                          | 192.2            | 182.1        |
| Strain                              | Strain                          | 188.1            | 175.2        |

<sup>1</sup> To set more unified models, various sets of parameters were considered based on different serotypes and strains.

<sup>2</sup> As a model with a lower DIC is preferred to one with higher DIC, the preferred models were considered among models with lower DICs. In 21-dpv, the model in bold was preferred because its DIC was lowest among the models. In 28-dpv, the model in bold was determined to be preferred because the difference in its DIC with the model of the lowest DIC, which is the strain-based prediction model, is less than two, and the experiments need to be combined into smaller groups for simpler explanation of the relationships of serological titer with protection status.

<sup>3</sup> In 21-dpv, the experiments are divided into three groups: group 21D-1 comprising O/Jincheon-O/Jincheon; group 21D-2 comprising O/Primorsky-O/Jincheon, A/Yeoncheon-A/Yeoncheon, and Asia1/Shamir-Asia1/Shamir; and group 21D-3 comprising A/Pocheon-A/Yeoncheon trials. In the 28-dpv model, two separate trials were identified as models to predict the probability of protection with VNT titers: Group 28D-1 comprised the O/Jincheon-O/Jincheon and A/Yeoncheon-A/Yeoncheon trials, and group 28D-2 comprised the O/Primorsky-O/Jincheon, A/Pocheon-A/Yeoncheon, and Asia1/Shamir-Asia1/Shamir trials. These allocations are based on a *post hoc* comparison of estimated intercepts in which the slope was common.
