# Supplementary material for: An Alternative Serological Measure for Assessing Foot-and-Mouth Disease Vaccine Efficacy against Homologous and Heterologous Viral Challenges in Pigs
Source: MDPI journal article supplement (doi:10.3390/vaccines12010010), 2023-12-21
Supplement: s1 [file s1]

Table S2. Estimates for the intercepts and slopes in the models for the probability of protection after challenge with FMDV.

| Model  | Group | Intercept ( <i>a</i> )                          | Slope ( <i>b</i> ) |
|--------|-------|-------------------------------------------------|--------------------|
| 21-dpv | 21D-1 | -5.07 <sup>1</sup> (-6.57 - -3.69) <sup>2</sup> | 3.81 (2.88-4.85)   |
|        | 21D-2 | -4.05 (-5.34 - -2.81)                           |                    |
|        | 21D-3 | -2.96 (-4.01 - -1.89)                           |                    |
| 28-dpv | 28D-1 | -5.20 (-6.67 - -3.81)                           | 3.83 (2.91-4.82)   |
|        | 28D-2 | -3.72 (-4.85 - -2.65)                           |                    |

<sup>1</sup> Posterior median, <sup>2</sup> 95% confidence interval
