# Supplementary material for: An Alternative Serological Measure for Assessing Foot-and-Mouth Disease Vaccine Efficacy against Homologous and Heterologous Viral Challenges in Pigs
Source: Vaccines (Basel). 2023 Dec 21;12(1):10. doi: 10.3390/vaccines12010010 (PMC10820997; doi:10.3390/vaccines12010010)
Supplement: Supplementary file 1 [file vaccines-12-00010-s001.zip › Data S1.xlsx]

## Sheet: Type O
expt	vaccine	challenge	log.titer.21	log.titer.28	total	protection	onset day	peak lesion score
O-1	O_jc	O_jc	1.65	1.51	1	1		0
O-1	O_jc	O_jc	1.34	1.65	1	1		0
O-1	O_jc	O_jc	1.2	1.34	1	1		0
O-1	O_jc	O_jc	1.04	1.34	1	1		0
O-1	O_jc	O_jc	1.04	0	1	0	3	5
O-1	O_jc	O_jc	1.2	0	1	0	4	5
O-1	O_jc	O_jc	0.9	0	1	0	3	4
O-1	O_jc	O_jc	0.9	0	1	0	3	5
O-1	O_jc	O_jc	0	0	1	0	4	5
O-1	O_jc	O_jc	0	0	1	0	2	4
O-1	O_jc	O_jc	1.04	0	1	0	3	5
O-1	O_jc	O_jc	1.2	1.34	1	0	4	3
O-1	O_jc	O_jc	0.9	1.51	1	0	4	3
O-1	O_jc	O_jc	1.2	1.2	1	0	3	5
O-2	O_jc	O_jc	1.51	1.95	1	1		0
O-2	O_jc	O_jc	1.2	0	1	0	4	4
O-2	O_jc	O_jc	1.04	1.81	1	1		0
O-2	O_jc	O_jc	1.2	1.51	1	1		0
O-2	O_jc	O_jc	1.51	1.2	1	1		0
O-2	O_jc	O_jc	1.36	1.51	1	1		0
O-2	O_jc	O_jc	1.2	1.2	1	0	3	4
O-2	O_jc	O_jc	1.2	0	1	0	3	4
O-2	O_jc	O_jc	0	0	1	0	3	5
O-2	O_jc	O_jc	0.9	1.2	1	0	5	2
O-2	O_jc	O_jc	0	0	1	0	3	4
O-2	O_jc	O_jc	0	0	1	0	3	4
O-2	O_jc	O_jc	1.04	1.2	1	0	5	4
O-2	O_jc	O_jc	0.9	0	1	0	4	3
O-2	O_jc	O_jc	1.2	1.2	1	0	4	5
O-3	O_pm	O_jc	1.34	0.9	1	0	3	4
O-3	O_pm	O_jc	1.34	0	1	0	4	1
O-3	O_pm	O_jc	1.04	1.51	1	1		0
O-3	O_pm	O_jc	1.51	1.34	1	1		0
O-3	O_pm	O_jc	1.04	0.9	1	0	3	5
O-3	O_pm	O_jc	1.34	1.34	1	0	3	5
O-3	O_pm	O_jc	1.34	1.34	1	0	3	2
O-3	O_pm	O_jc	0	0	1	0	4	5
O-3	O_pm	O_jc	1.34	1.04	1	0	4	1
O-3	O_pm	O_jc	1.04	0.9	1	0	3	5
O-3	O_pm	O_jc	1.2	0.9	1	0	7	1
O-3	O_pm	O_jc	0	0.9	1	0	3	5
O-3	O_pm	O_jc	0	1.04	1	0	4	4
O-3	O_pm	O_jc	0	0	1	0	4	4
O-4	O_pm	O_jc	1.34	1.34	1	1		0
O-4	O_pm	O_jc	1.51	1.51	1	1		0
O-4	O_pm	O_jc	1.81	1.81	1	1		0
O-4	O_pm	O_jc	2.11	2.26	1	1		0
O-4	O_pm	O_jc	1.51	1.34	1	1		0
O-4	O_pm	O_jc	1.95	2.11	1	1		0
O-4	O_pm	O_jc	1.51	1.04	1	1		0
O-4	O_pm	O_jc	1.51	1.2	1	1		0
O-4	O_pm	O_jc	1.65	1.51	1	1		0
O-4	O_pm	O_jc	0	1.34	1	0	7	1
O-4	O_pm	O_jc	1.34	1.2	1	1		0
O-4	O_pm	O_jc	1.81	1.51	1	1		0
O-4	O_pm	O_jc	1.51	1.51	1	1		0
O-4	O_pm	O_jc	1.95	1.51	1	0	2	6
O-4	O_pm	O_jc	1.51	1.51	1	1		0
O-4	O_pm	O_jc	1.81	1.65	1	1		0
O-5	O_pm	O_jc	0	1.34	1	1		0
O-5	O_pm	O_jc	1.81	1.65	1	1		0
O-5	O_pm	O_jc	1.2	1.2	1	1		0
O-5	O_pm	O_jc	1.81	2.11	1	1		0
O-5	O_pm	O_jc	1.65	1.81	1	1		0
O-5	O_pm	O_jc	1.04	1.34	1	1		0
O-5	O_pm	O_jc		1.65	1	1		0
O-5	O_pm	O_jc	1.34	1.04	1	0	7	1
O-5	O_pm	O_jc	1.51	1.81	1	1		0
O-5	O_pm	O_jc	0.9	1.04	1	1		0
O-5	O_pm	O_jc	0	1.95	1	1		0
O-5	O_pm	O_jc	1.95	1.34	1	1		0
O-5	O_pm	O_jc	1.65	1.51	1	1		0
O-5	O_pm	O_jc	1.51	2.11	1	1		0
O-6	O_pm	O_jc	1.65	0.9	1	0	7	4
O-6	O_pm	O_jc	1.81	1.04	1	1		0
O-6	O_pm	O_jc	1.34	1.04	1	1		0
O-6	O_pm	O_jc	2.26	1.65	1	1		0
O-6	O_pm	O_jc	2.26	1.51	1	1		0
O-6	O_pm	O_jc	2.11	1.51	1	1		0
O-6	O_pm	O_jc	1.81	1.04	1	1		0
O-6	O_pm	O_jc	0	0	1	0	4	5
O-6	O_pm	O_jc	1.2	0	1	1		0
O-6	O_pm	O_jc	1.81	1.2	1	1		0
O-6	O_pm	O_jc	1.51	1.04	1	1		0
O-6	O_pm	O_jc	2.11	1.51	1	1		0
O-6	O_pm	O_jc	1.65	1.2	1	1		0
O-7	O_pm	O_jc	1.95	1.51	1	1		0
O-7	O_pm	O_jc	1.34	1.2	1	1		0
O-7	O_pm	O_jc	2.26	1.51	1	1		0
O-7	O_pm	O_jc	1.81	1.65	1	1		0
O-7	O_pm	O_jc	2.26	2.11	1	1		0
O-7	O_pm	O_jc	1.95	1.51	1	0	3	6
O-7	O_pm	O_jc	1.95	1.51	1	1		0
O-7	O_pm	O_jc	1.65	1.51	1	1		0
O-7	O_pm	O_jc	1.51	1.2	1	1		0
O-7	O_pm	O_jc	1.95	1.51	1	1		0

## Sheet: Type A
expt	vaccine	challenge	log.titer.21	log.titer.28	total	protection	onset day	peak lesion score
A-1	A_pc	A_yc	1.95	1.95	1	1		0
A-1	A_pc	A_yc	2.41	2.41	1	1		0
A-1	A_pc	A_yc	2.41	3.01	1	1		0
A-1	A_pc	A_yc	1.34	1.81	1	1		0
A-1	A_pc	A_yc	1.34	2.11	1	1		0
A-1	A_pc	A_yc	2.41	2.71	1	1		0
A-1	A_pc	A_yc	2.71	2.71	1	1		0
A-1	A_pc	A_yc	1.65	1.95	1	1		0
A-1	A_pc	A_yc	1.34	1.34	1	1		0
A-1	A_pc	A_yc	1.04	2.11	1	1		0
A-1	A_pc	A_yc	1.81	2.41	1	1		0
A-1	A_pc	A_yc	1.95	2.56	1	1		0
A-1	A_pc	A_yc	2.11	2.26	1	1		0
A-1	A_pc	A_yc	2.11	1.81	1	1		0
A-1	A_pc	A_yc	1.95	2.11	1	1		0
A-2	A_pc	A_yc	1.34	1.81	1	1		0
A-2	A_pc	A_yc	0	0	1	0	3	4
A-2	A_pc	A_yc	1.04	1.51	1	1		0
A-2	A_pc	A_yc	1.65	2.11	1	1		0
A-2	A_pc	A_yc	1.65	2.56	1	1		0
A-2	A_pc	A_yc	0	0	1	1		0
A-2	A_pc	A_yc	1.65	1.95	1	1		0
A-2	A_pc	A_yc	1.34	2.11	1	1		0
A-2	A_pc	A_yc	1.34	1.95	1	1		0
A-2	A_pc	A_yc	1.34	1.34	1	1		0
A-3	A_yc	A_yc	0	0	1	0	5	5
A-3	A_yc	A_yc	1.95	2.26	1	1		0
A-3	A_yc	A_yc	1.34	1.95	1	1		0
A-3	A_yc	A_yc	0	1.04	1	1		0
A-3	A_yc	A_yc	1.65	1.95	1	1		0
A-3	A_yc	A_yc	0	0	1	0	3	5
A-3	A_yc	A_yc	0	0	1	0	5	4
A-3	A_yc	A_yc	0	0	1	0	3	5
A-3	A_yc	A_yc	0	0	1	0	3	5
A-3	A_yc	A_yc	0	0	1	0	3	6
A-3	A_yc	A_yc	0	0	1	0	5	5
A-3	A_yc	A_yc	0	0	1	0	5	2
A-3	A_yc	A_yc	0	0	1	0	6	4
A-3	A_yc	A_yc	0	0	1	0	6	4
A-3	A_yc	A_yc	0	0	1	0	5	6
A-6	A_pc	A_yc	0	0	1	0	2	5
A-6	A_pc	A_yc	0	1.65	1	1		0
A-6	A_pc	A_yc	0	1.34	1	1		0
A-6	A_pc	A_yc	1.51	1.95	1	1		0
A-6	A_pc	A_yc	1.65	1.95	1	1		0
A-6	A_pc	A_yc	0	0	1	0	2	5
A-6	A_pc	A_yc	0	0	1	1		0
A-6	A_pc	A_yc	0	0	1	1		0
A-6	A_pc	A_yc	0	0	1	1		0
A-6	A_pc	A_yc	1.2	1.34	1	1		0
A-6	A_pc	A_yc	0	0	1	0	2	6
A-6	A_pc	A_yc	0	0	1	0	5	1
A-6	A_pc	A_yc	0	0	1	0	3	4
A-6	A_pc	A_yc	0	1.34	1	0	4	3
A-6	A_pc	A_yc	0	0	1	0	3	6
A-7	A_pc	A_yc	0.9	1.51	1	1		0
A-7	A_pc	A_yc	0	0.9	1	1		0
A-7	A_pc	A_yc	1.04	1.34	1	0	4	3
A-7	A_pc	A_yc	1.51	1.51	1	1		0
A-7	A_pc	A_yc	0	0	1	0	5	1
A-7	A_pc	A_yc	0	0	1	0	3	5
A-7	A_pc	A_yc	0	0	1	0	2	5
A-7	A_pc	A_yc	0	0	1	0	5	4
A-7	A_pc	A_yc	0	0	1	0	2	5
A-7	A_pc	A_yc	0	0	1	0	5	4
A-7	A_pc	A_yc	0	0	1	0	2	5
A-7	A_pc	A_yc	0	0	1	0	2	5
A-7	A_pc	A_yc	0	0	1	0	3	5
A-7	A_pc	A_yc	0	0	1	0	4	5

## Sheet: Type Asia1
expt	vaccine	challenge	log.titer.21	log.titer.28	total	protection	onset day	peak lesion score
As1-1	AS_sm	AS_sm	0.9	0	1	0	3	6
As1-1	AS_sm	AS_sm	1.95	2.11	1	1		0
As1-1	AS_sm	AS_sm	1.65	1.65	1	1		0
As1-1	AS_sm	AS_sm	1.81	1.81	1	1		0
As1-1	AS_sm	AS_sm	2.26	2.41	1	1		0
As1-1	AS_sm	AS_sm	1.34	1.04	1	0	3	1
As1-1	AS_sm	AS_sm	1.95	2.26	1	1		0
As1-1	AS_sm	AS_sm	1.04	1.51	1	0	2	2
As1-1	AS_sm	AS_sm	1.34	1.81	1	1		0
As1-1	AS_sm	AS_sm	1.34	1.95	1	1		0
As1-1	AS_sm	AS_sm	2.26	2.26	1	1		0
As1-1	AS_sm	AS_sm	1.51	1.81	1	1		0
As1-1	AS_sm	AS_sm	1.65	2.11	1	1		0
As1-2	AS_sm	AS_sm		2.11	1	1		0
As1-2	AS_sm	AS_sm		1.95	1	1		0
As1-2	AS_sm	AS_sm		1.2	1	1		0
As1-2	AS_sm	AS_sm		1.04	1	1		0
As1-2	AS_sm	AS_sm		2.11	1	1		0
As1-2	AS_sm	AS_sm		1.04	1	1		0
As1-2	AS_sm	AS_sm		0	1	0	5	4
As1-2	AS_sm	AS_sm		1.04	1	1		0
As1-2	AS_sm	AS_sm		1.65	1	1		0
As1-2	AS_sm	AS_sm		0.9	1	0	7	2
As1-2	AS_sm	AS_sm		1.95	1	1		0
As1-2	AS_sm	AS_sm		1.95	1	1		0
As1-2	AS_sm	AS_sm		1.51	1	1		0
As1-2	AS_sm	AS_sm		2.26	1	0	7	1
As1-2	AS_sm	AS_sm		2.11	1	1		0
As1-2	AS_sm	AS_sm		0.9	1	1		0
As1-3	AS_sm	AS_sm	1.2	1.65	1	1		0
As1-3	AS_sm	AS_sm	1.51	1.95	1	1		0
As1-3	AS_sm	AS_sm	1.95	1.81	1	1		0
As1-3	AS_sm	AS_sm	2.26	2.26	1	1		0
As1-3	AS_sm	AS_sm	2.26	2.11	1	1		0
As1-3	AS_sm	AS_sm	1.95	2.11	1	1		0
As1-3	AS_sm	AS_sm	1.81	1.95	1	1		0
As1-3	AS_sm	AS_sm	1.65	2.26	1	1		0
As1-3	AS_sm	AS_sm	1.51	2.26	1	1		0
As1-3	AS_sm	AS_sm	0	0	1	1		0
As1-3	AS_sm	AS_sm	1.81	2.11	1	1		0
As1-3	AS_sm	AS_sm	1.65	1.65	1	1		0
As1-3	AS_sm	AS_sm	2.11	2.26	1	1		0
As1-3	AS_sm	AS_sm	2.11	2.11	1	1		0
As1-3	AS_sm	AS_sm	1.81	2.11	1	1		0
As1-3	AS_sm	AS_sm	1.2	1.04	1	1		0
As1-4	AS_sm	AS_sm	0	0	1	0	2	5
As1-4	AS_sm	AS_sm	0	0	1	1		0
As1-4	AS_sm	AS_sm	0	0	1	0	4	5
As1-4	AS_sm	AS_sm	0	0.9	1	0	3	5
As1-4	AS_sm	AS_sm	0	0	1	0	3	4
As1-4	AS_sm	AS_sm	0	0	1	1		0
As1-4	AS_sm	AS_sm	0	0	1	1		0
As1-4	AS_sm	AS_sm	0	0	1	0	3	6
As1-4	AS_sm	AS_sm	0	0	1	0	2	5
As1-4	AS_sm	AS_sm	0	0	1	0	3	6
As1-4	AS_sm	AS_sm	0	0	1	0	4	4
As1-4	AS_sm	AS_sm	0	0	1	0	2	4
As1-4	AS_sm	AS_sm	0	0	1	0	3	6
As1-4	AS_sm	AS_sm	0	0	1	0	3	6
As1-4	AS_sm	AS_sm	1.51	1.34	1	1		0
As1-4	AS_sm	AS_sm	1.51	1.34	1	1		0
As1-5	AS_sm	AS_sm	2.11	2.26	1	1		0
As1-5	AS_sm	AS_sm	0.9	1.2	1	1		0
As1-5	AS_sm	AS_sm	1.65	1.81	1	0	2	1
As1-5	AS_sm	AS_sm	1.65	1.95	1	0	4	1
As1-5	AS_sm	AS_sm	1.51	1.65	1	1		0
As1-5	AS_sm	AS_sm	2.11	2.26	1	1		0
As1-5	AS_sm	AS_sm	1.04	0	1	0	3	2
As1-5	AS_sm	AS_sm	1.51	1.81	1	1		0
As1-5	AS_sm	AS_sm	1.95	1.95	1	1		0
As1-5	AS_sm	AS_sm	2.26	2.26	1	1		0
As1-5	AS_sm	AS_sm	1.81	2.26	1	1		0
As1-5	AS_sm	AS_sm	1.81	2.26	1	1		0
As1-5	AS_sm	AS_sm	1.65	1.65	1	1		0
